# Supplementary material for: Two series of reactant's ratio-dependent lanthanide organic frameworks derived from nicotinic acid N-oxide and oxalate: synthesis, crystal structures and luminescence properties
Source: Royal Society of Chemistry journal article supplement (doi:10.1039/c4dt03668a), 2015-01-01
Supplement: c4dt03668a1.pdf [file c4dt03668a1.pdf]

### Supporting Information

## Two series of reactants' ratio-dependent lanthanide organic frameworks derived from nicotinic acid N-oxide and oxalate: Synthesis, crystal structures and luminescence properties

Yanyan Yu, Lijuan Zhang\*, Yunshan Zhou\* and Zareen Zuhra

State Key Laboratory of Chemical Resource Engineering, Institute of Science, Beijing University of Chemical Technology, Beijing 100029, P. R. China

**Chart S1** The ligands' structural formulae and abbreviations used in the present work

| Name of ligands   | Structural formulae                                                                 | Abbreviations     |
|-------------------|-------------------------------------------------------------------------------------|-------------------|
| Nicotinic N-oxide | 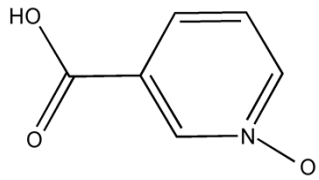  | HNNO              |
| Oxalic acid       |  | H <sub>2</sub> OX |

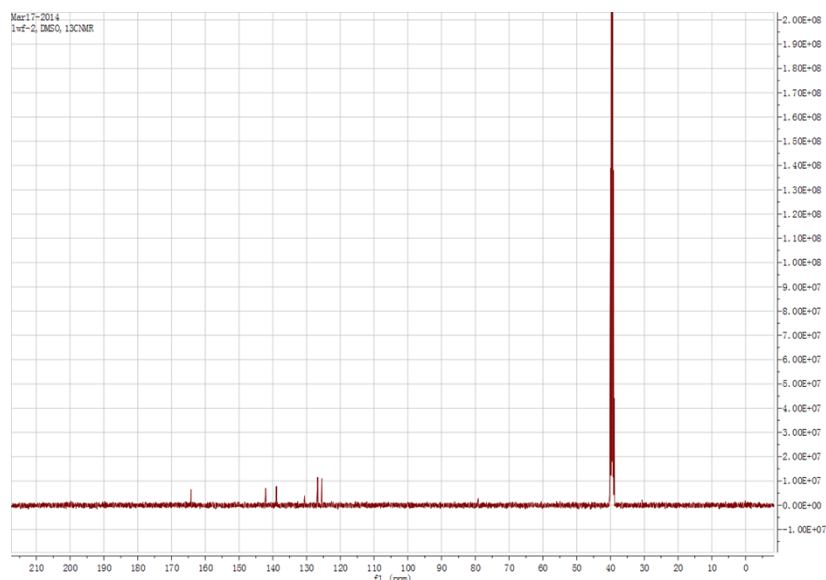

**Fig. S1** The <sup>13</sup>C spectrum of HNNO in DMSO.

**Table S1** Selected bond lengths [Å] and angles [°] for compound **1**

| Compound 1        |            |                      |            |
|-------------------|------------|----------------------|------------|
| Bond              | Distance   | Bond                 | Distance   |
| Eu(1)-O(4)        | 2.486(3)   | Eu(1)-O(5) #3        | 2.447(3)   |
| Eu(1)-O(3)        | 2.421(3)   | Eu(1)-O(8)           | 2.454(3)   |
| Eu(1)-O(6)        | 2.428(3)   | Eu(1) -O(9)          | 2.528(3)   |
| Eu(1)-O(1)#1      | 2.530(3)   | Eu(1)-O(7)#4         | 2.468(3)   |
| Eu(1)-O(2)#2      | 2.355(3)   | Eu(1) -C(8)          | 3.246(3)   |
| Moiety            | Angle      | Moiety               | Angle      |
| O(1)#1-Eu(1)-O(4) | 73.32(10)  | O(8) -Eu(1)-O(7) #3  | 93.69(11)  |
| O(9) -Eu(1)-O(4)  | 120.53(10) | O(8) -Eu(1)-C(8)     | 73.52(10)  |
| C(7)#2-Eu(1)-O(4) | 46.97(10)  | O(9) -Eu(1)-O(1)#1   | 137.94(11) |
| C(8) -Eu(1)-O(4)  | 139.67(9)  | O(9) -Eu(1)-C(7)#2   | 136.16(10) |
| O(4) -Eu(1)-O(3)  | 68.94(10)  | O(9) -Eu(1)-C(8)     | 97.59(11)  |
| O(6) -Eu(1)-O(3)  | 132.74(10) | O(7)#3-Eu(1)-O(4)    | 137.77(10) |
| O(1)#1-Eu(1)-O(3) | 141.94(10) | O(7) #3-Eu(1)-O(1)#1 | 79.20(10)  |
| O(5)#2-Eu(1)-O(3) | 77.17(10)  | O(7) #3-Eu(1)-O(9)   | 64.55(10)  |
| O(8) -Eu(1)-O(3)  | 70.62(11)  | O(7) #3-Eu(1)-O(4)   | 157.74(9)  |
| O(9) -Eu(1)-O(3)  | 69.63(11)  | O(7)#3-Eu(1)-C (7)#2 | 46.82(10)  |
| C(7)#2-Eu(1)-O(3) | 67.10(10)  | O(7)#3-Eu(1)-C(8)    | 113.32(10) |
| O(7)#3-Eu(1)-O(3) | 134.18(10) | C(7) -O(4)- Eu(1)    | 118.1(3)   |
| C(8) -Eu(1)-O(3)  | 144.11(10) | C(6)- O(3)- Eu(1)    | 134.0(3)   |
| O(4) -Eu(1)-O(6)  | 130.10(9)  | C(8)- O(6)- Eu(1)    | 120.7(3)   |
| O(1)#1-Eu(1)-O(6) | 71.21(10)  | N(1)-O(1)- Eu(1) #5  | 126.7(3)   |

Symmetry transformations used to generate equivalent atoms: (#1) +x, +y, 1+z; (#2) 1-x, 1-y, 1-z; (#3) 1-x, 2-y, 1-z; (#4) -x, 1-y, 2-z; (#5) +x, +y, -1+z;.

**Table S2** Selected bond lengths [Å] and angles [°] for compound **7**

| Compound 7          |            |                      |            |
|---------------------|------------|----------------------|------------|
| Bond                | Distance   | Bond                 | Distance   |
| Tb(1)-O(3)          | 2.318(3)   | Tb(1)-O(7)#1         | 2.399(3)   |
| Tb(1)-O(8)          | 2.417(3)   | Tb(1)-O(9)           | 2.426(3)   |
| Tb(1)-O(5)#2        | 2.380(3)   | Tb(1)-O(4)           | 2.360(3)   |
| Tb(1)-O(1)#4        | 2.374(3)   | O(5)- Tb(1)#2        | 2.380(3)   |
| Moiety              | Angle      | Moiety               | Angle      |
| O(3)-Tb(1)-O(7) )#1 | 72.58(10)  | O(3) -Tb(1)-O(8)     | 85.38(10)  |
| O(3)- Tb(1)-O(9)    | 71.68(10)  | O(3) - Tb(1)- O(5)#2 | 143.48(10) |
| O(3)-Tb(1)-O(4)     | 84.86(11)  | O(3)-Tb(1)-O(2)#3    | 105.64(11) |
| O(3)-Tb(1)-O(1)#4   | 143.13(10) | O(7)#1-Tb(1)-O(8)    | 67.63(10)  |
| O(7)#1-Tb(1)-O(9)   | 129.28(10) | O(8)-Tb(1)-O(9)      | 141.50(10) |
| O(5)#2-Tb(1)-O(7)#1 | 140.90(10) | O(5)#2-Tb(1)-O(8)    | 117.22(10) |
| O(5)#2-Tb(1)-O(9)   | 73.31(10)  | O(4)-Tb(1)-O(7)#1    | 132.80(11) |
| O(4)-Tb(1)-O(8)     | 69.74(10)  | O(4)-Tb(1)-O(9)      | 77.58(10)  |
| O(4)-Tb(1)-O(5)#2   | 77.79(11)  | O(4)-Tb(1)-O(2)#3    | 147.01(9)  |
| O(4)-Tb(1)-O(1)#4   | 112.58(11) | O(2)#3-Tb(1)-O(7)#1  | 79.93(10)  |
| O(2)#3-Tb(1)-O(8)   | 140.93(10) | O(2)#3-Tb(1)-O(9)    | 76.41(11)  |
| O(2)#3-Tb(1)-O(5)#2 | 75.55(11)  | O(2)#3-Tb(1)-O(1)#4  | 77.76(11)  |
| O(1)#4-Tb(1)-O(7)#1 | 71.97(10)  | O(1)#4-Tb(1)-O(8)    | 72.06(11)  |
| O(1)#4-Tb(1)-O(9)   | 141.84(11) | O(1)#4-Tb(1)-O(5)#2  | 73.36(10)  |
| C(13)-O(8)- Tb(1)   | 117.2(3)   | N(2)-O(4)-Tb(1)      | 124.3(2)   |

Symmetry transformations used to generate equivalent atoms: (#1) -x, 1-y, -z; (#2) 1-x, 2-y, 1-z; (#3) 1-x, 1-y, -z; (#4) +x, 1+y, +z; (#5) +x, -1+y, +z.

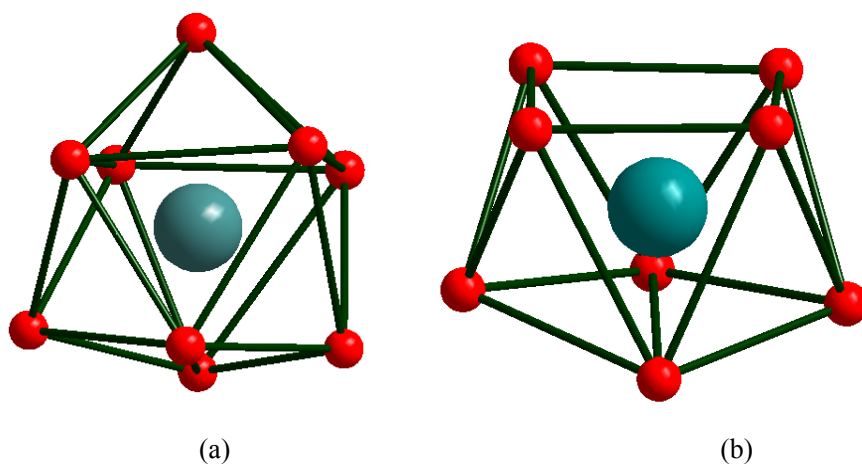

**Fig. S2** The coordination geometry of Eu in compound **1** (a) and Tb in compound **7** (b).

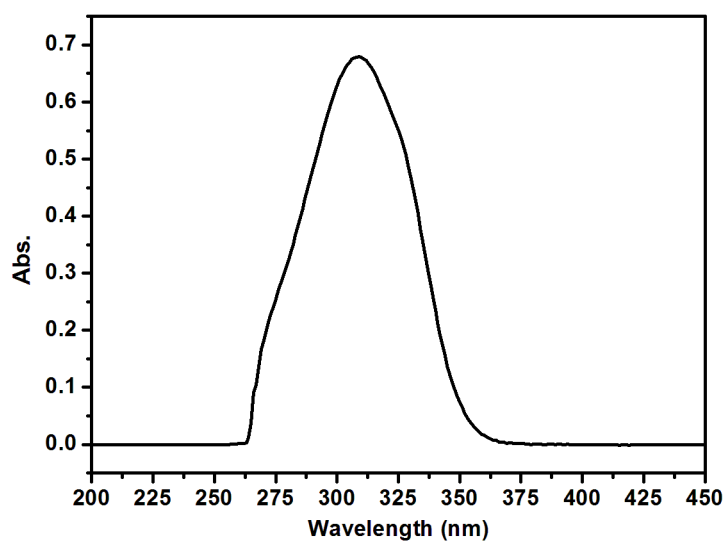

**Fig. S3** The UV-Vis spectrum of HNNO in DMF (Concentration: 0.1mmol/L)

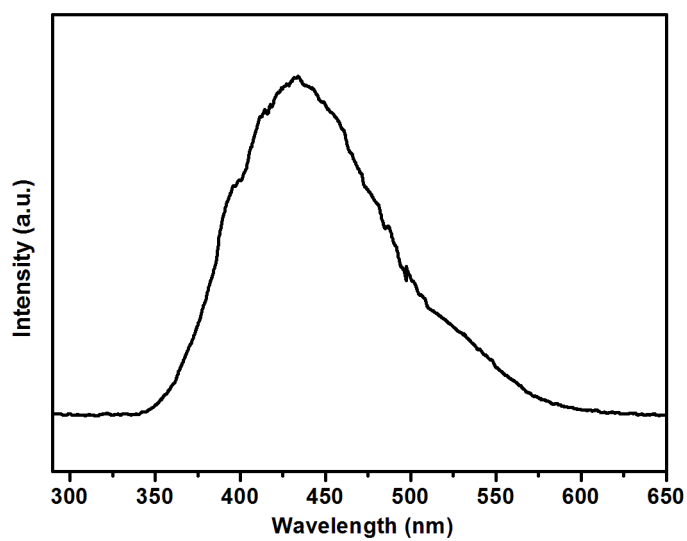

**Fig. S4** The phosphorescence spectrum of compound **5** at 77K.
